# Supplementary material
Source: PubMed Central journal article supplement (PMC2323640)
Supplement: ppat.0040027.sg003.pdf [file ppat.0040027.sg003.pdf]

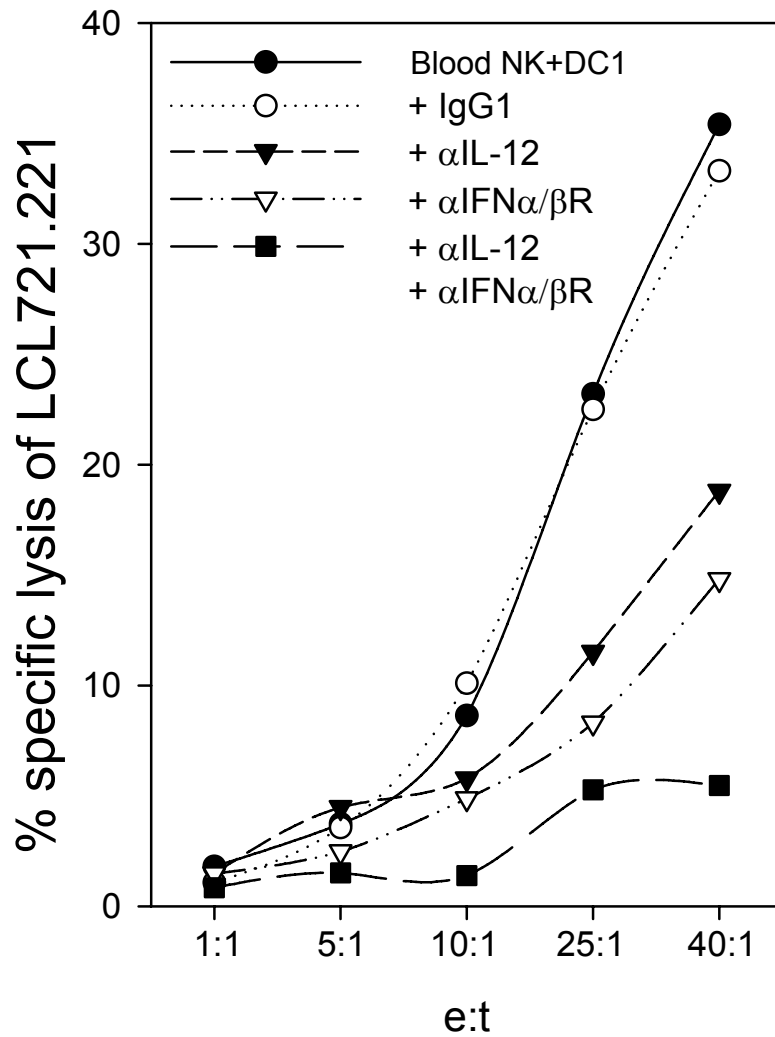

**Figure S3:** Upregulation of NK cell cytotoxicity by DCs depends on IL-12 and type I interferons. Blood NK cells were cocultured with DC1s for 2 d in the presence or absence of blocking antibodies. Upregulation of cytotoxicity was assessed by measuring lysis of the NK sensitive target cell line LCL721.221 at the indicated effector to target cell ratios.
