# Supplementary material
Source: PubMed Central journal article supplement (PMC2323640)
Supplement: ppat.0040027.sg004.pdf [file ppat.0040027.sg004.pdf]

**A**gated on CD3<sup>-</sup>CD56<sup>+</sup> tonsil NK cells: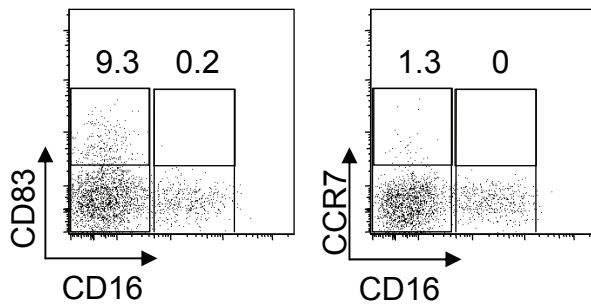**B**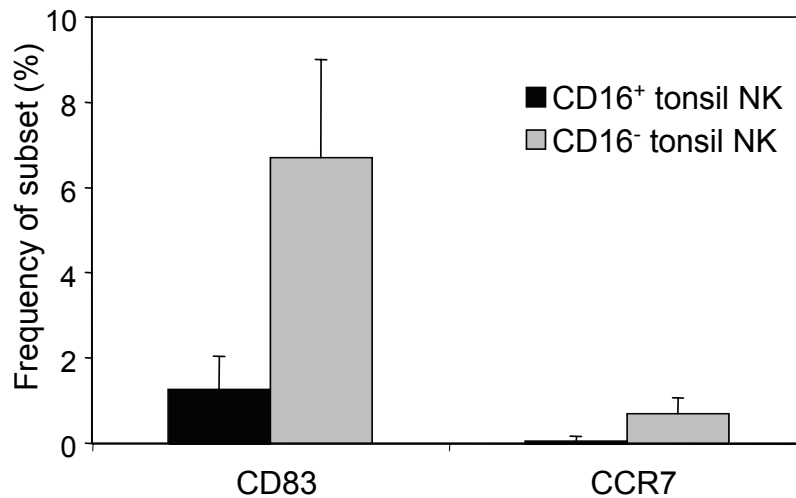

**Figure S4:** Tonsillar NK cells do not express CCR7 and only a low number expresses CD83. Mononuclear cells from tonsil were stained with CD3 and CD56 to identify CD3<sup>-</sup>CD56<sup>+</sup> NK cells. In addition cells were stained with antibodies against CD16 and CD83 or CCR7. (A) shows a representative experiment, and (B) summarizes data from four independent experiments (mean  $\pm$  s.d.).
