# Supplementary material
Source: PubMed Central journal article supplement (PMC2323640)
Supplement: ppat.0040027.st001.pdf [file ppat.0040027.st001.pdf]

**Table S1:** Surface expression of DC maturation markers

| DC type              | maturation | HLA-DR           | CD25 | CD80 | CD83 | CD86 | IL-15R $\alpha$ | IL-15 |
|----------------------|------------|------------------|------|------|------|------|-----------------|-------|
| monocyte-derived DCs | none       | 307 <sup>a</sup> | 87   | 301  | 104  | 412  | 4               | 21    |
|                      | cyt        | 435              | 265  | 546  | 407  | 690  | 15              | 62    |
|                      | polyI:C    | 429              | 267  | 602  | 390  | 745  | 37              | 75    |
|                      | DC1        | 429              | 347  | 620  | 412  | 742  | 68              | 72    |
|                      | LPS        | 403              | 269  | 558  | 429  | 671  | 20              | 52    |
|                      | dsRNA      | 354              | 205  | 450  | 167  | 621  | 8               | 23    |

<sup>a</sup>: Values indicate mean fluorescence intensities (subtracted from isotype control staining)

Similar results were obtained in at least four experiments
